# Supplementary material for: Stick-slip control of the Carbopol microgels on polymethyl methacrylate transparent smooth walls
Source: Royal Society of Chemistry journal article supplement (doi:10.1039/c2sm26244d), 2012-01-01
Supplement: c2sm26244d.pdf [file c2sm26244d.pdf]

## ELECTRONIC SUPPORTING INFORMATION

### Stick-slip control of the Carbopol microgels on Polymethyl methacrylate transparent smooth walls

METIVIER Christel, RHARBI Yahya, MAGNIN Albert and BOU ABBOUD Antoine

Content:

- Fig. 1: SAOS rheometry of the Carbopol gels at a concentration of 0.15%wt.
- Fig. 2: Photographs of the powder vertical line at free surface of Carbopol gels during velocity controlled rheometry ( $\dot{\gamma} = 10^{-2} \text{ s}^{-1}$ ).

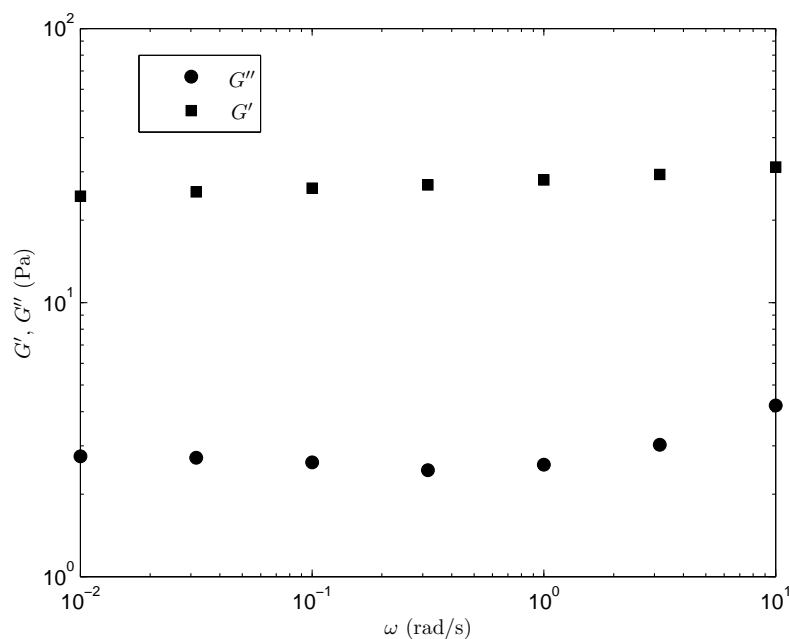

Figure 1: SAOS rheometry of the Carbopol 940 gels at a concentration of 0.15%wt.

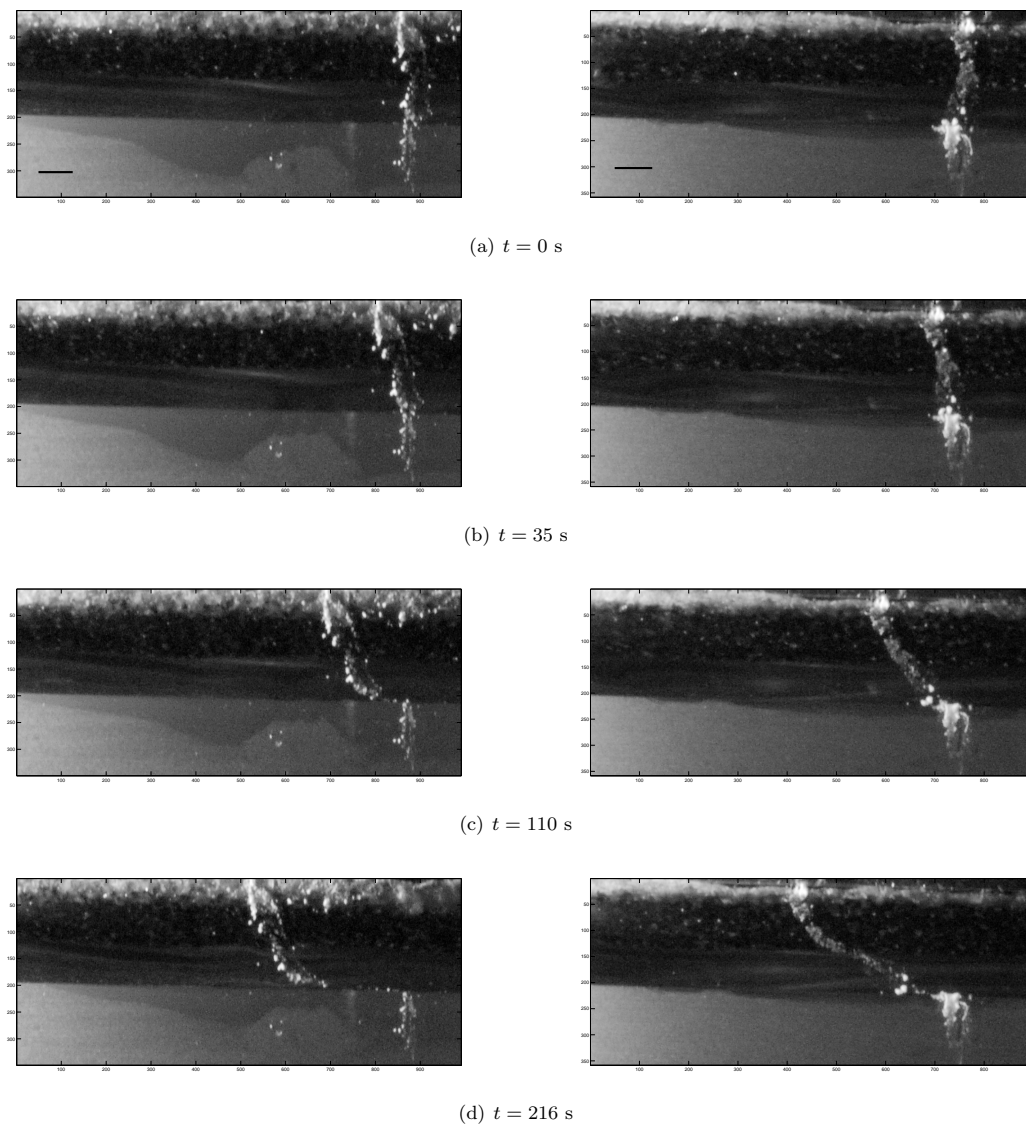

Figure 2: Photographs of the powder vertical line at free surface of Carbopol gels during velocity controlled rheometry ( $\dot{\gamma} = 10^{-2} \text{ s}^{-1}$ ). The lower plate is a raw PMMA surface (left row) and a treated PMMA surface (right row), the horizontal black line on frames (a) corresponds to 1 mm. Frames (a): initial line ; (b): elastic response in the samples, no slip at the lower PMMA plate ; (c): Raw PMMA (left) - Elastic response in the sample and the wall slip occurs, Treated PMMA (right) - adherence at the lower plate, the gel is homogeneously sheared in the bulk ; (d): Raw PMMA (left) - Elastic response in the sample (similar to (c)), the wall slip is larger than in (c), Treated PMMA (right) - adherence at the lower plate, the shear is homogeneous in the bulk and larger than in (c).
